# Supplementary material for: Fusaoctaxin A, an Example of a Two-Step Mechanism for Non-Ribosomal Peptide Assembly and Maturation in Fungi
Source: PubMed Central journal article supplement (PMC6563249; doi:10.3390/toxins11050277), 2019-05-16
Supplement: toxins-11-00277-s001.pdf [file toxins-11-00277-s001.pdf]

## Supplementary Materials: Fusaoctaxin A, An Example of a Two-Step Mechanism for Non-Ribosomal Peptide Assembly and Maturation in Fungi

Klaus Ringsborg Westphal, Katrine Amalie Hamborg Nielsen, Rasmus Dam Wollenberg, Mathias Bonde Møllehøj, Simone Bachleitner, Lena Studt, Erik Lysøe, Henriette Giese, Reinhard Wimmer, Jens Laurids Sørensen and Teis Esben Sondergaard \*

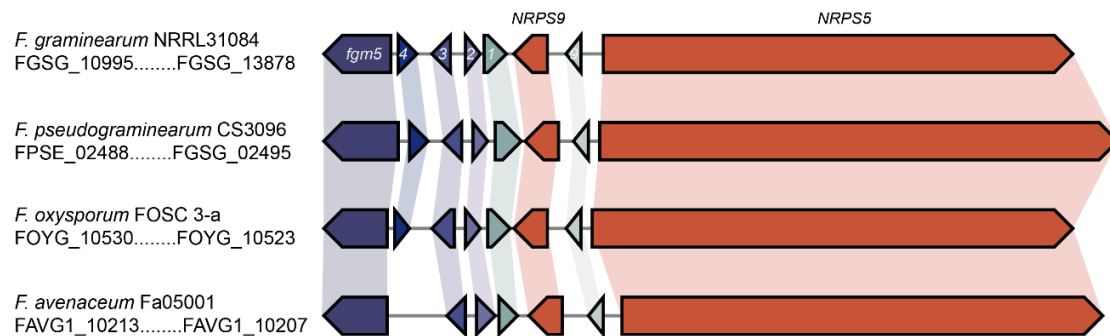

**Figure 1.** Synteny map of the fusaoctaxin A gene cluster. Clusters from *F. graminearum*, *F. pseudograminearum*, *F. oxysporum* and *F. avenaceum* were predicted from Antismash 3.0. An orthologue of the ankyrin-rich protein *fgm4* is present in *F. avenaceum*, but was not annotated in the original published genome sequence.

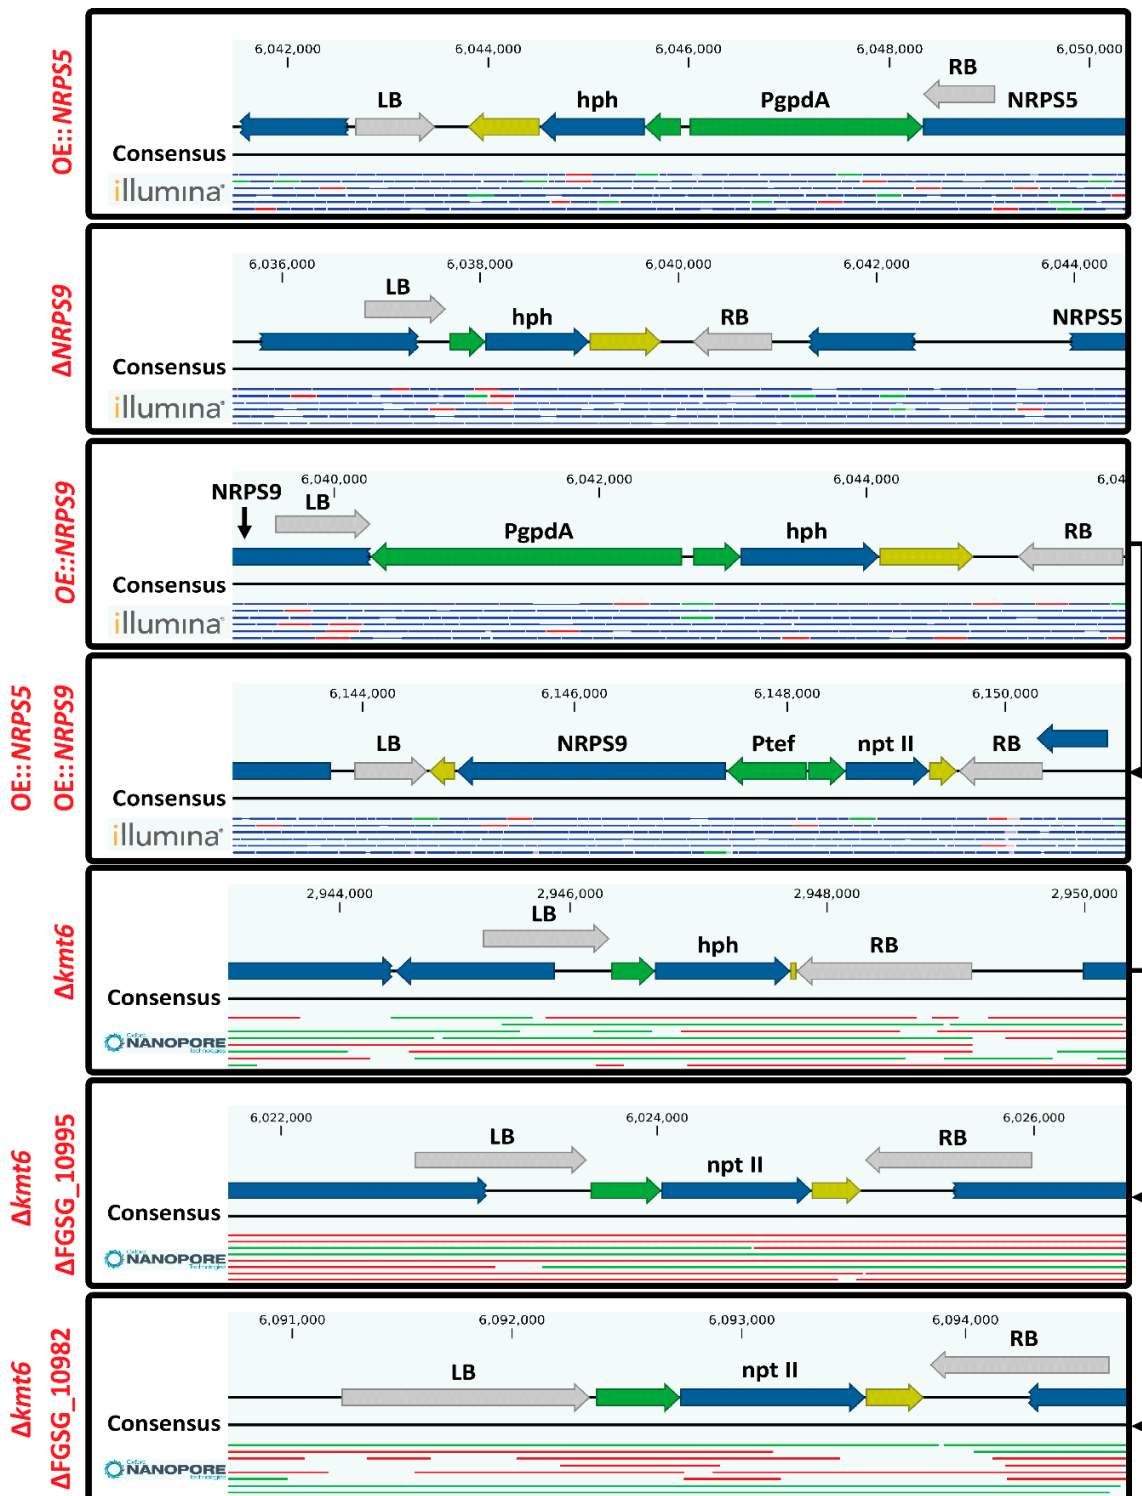

**Figure 2.** Southern by sequencing. Validation of mutant strains by either short-read Illumina sequencing or Oxford Nanopore long-read sequencing. The representative read-mappings are depicted as either paired-end (blue), sense strand (green) or anti-sense strand (red) reads. Only relevant annotations are highlighted. Green, yellow and blue annotations represent promoters, terminators and genes. Left (LB) and right (RB) borders indicate regions used to facilitate the targeted double homologous recombination event. A blastN analysis of contigs from a *de novo* assembly of Illumina reads and long-reads resulting from Oxford

Nanopore sequencing were conducted to confirm single integration events of the *hph* (hygromycin B phosphotransferase) or *nptII* (Neomycin phosphotransferase) genes. P<sub>gpdA</sub>: glyceraldehyde-3-phosphate dehydrogenase promoter, P<sub>tef</sub>: Translation elongation factor 1-alpha promoter.

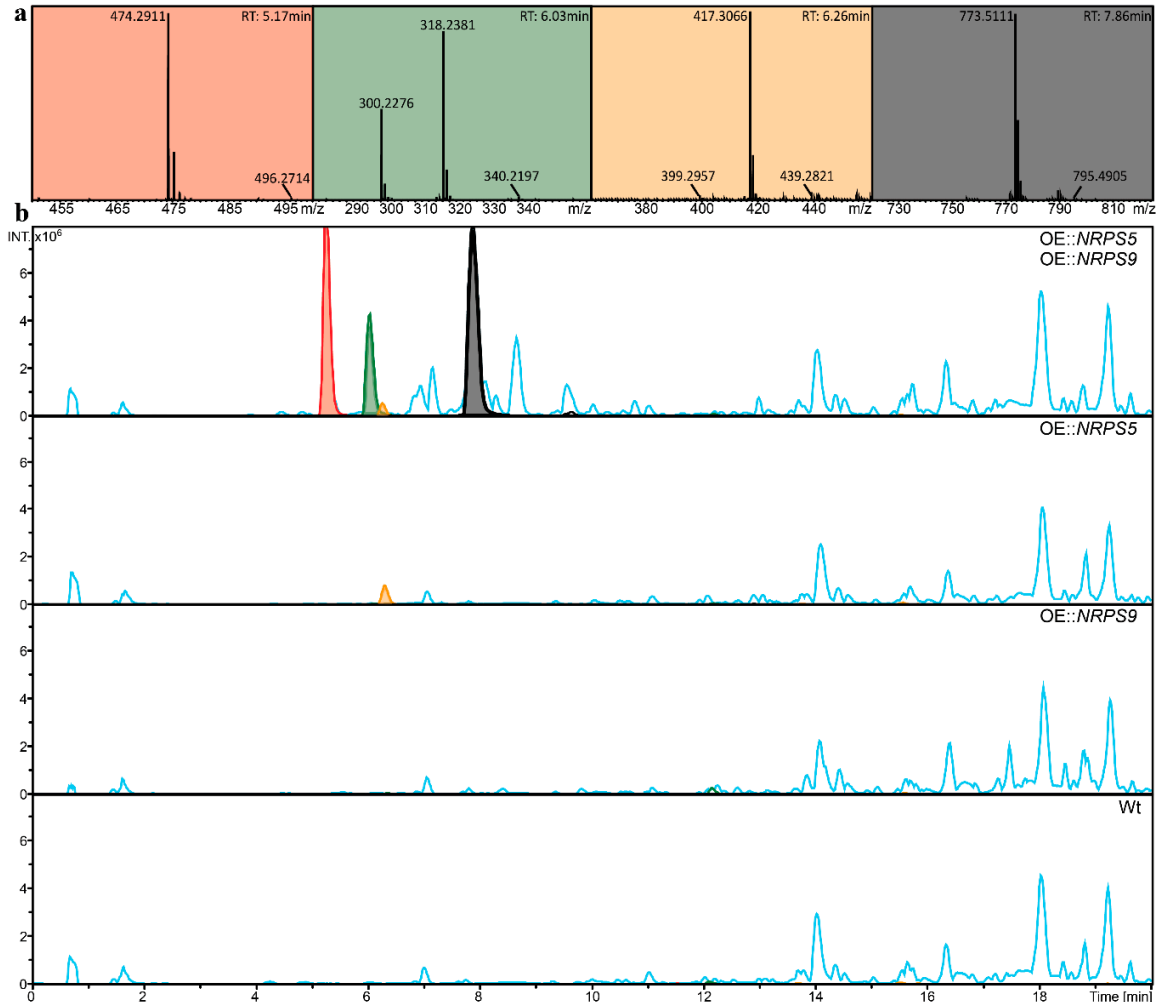

**Figure S3.** HPLC-HRMS analysis of secondary metabolite extracts from OE::NRPS5OE:: NRPS9, OE::NRPS5, OE:: NRPS9, and wild type grown on rice agar medium. **a**, Zooms of four mass spectra from OE::fgrAOE::fgrB. Red: RT 5.17 min. showing fusapentaxin A [M+H]<sup>+</sup> (*m/z* 474.2911) and [M+Na]<sup>+</sup> (*m/z* 496.2714). Green: RT 6.03 min. showing fusatrin A [M+H]<sup>+</sup> (*m/z* 318.2381), [M+Na]<sup>+</sup> (*m/z* 340.2197) and [M-H<sub>2</sub>O+H]<sup>+</sup> (*m/z* 300.2276). Orange: RT 6.26 min. showing fusatetraxin A [M+H]<sup>+</sup> (*m/z* 417.3066), [M+Na]<sup>+</sup> (*m/z* 439.2821) and [M-H<sub>2</sub>O+H]<sup>+</sup> (*m/z* 399.2957). Black: RT 7.86 min. showing fusaoctaxin A [M+H]<sup>+</sup> (*m/z* 773.5111) and [M+Na]<sup>+</sup> (*m/z* 795.4905). **b**, Four BPCs (blue) with EICs at *m/z* 474.2911 ± 0.5 Da (red), 318.2381 ± 0.5 Da (green), 417.3066 ± 0.5 Da (orange) and 773.5111 ± 0.5 Da (black).

| A             |                                    |                       |                                                                                |                           |                                                                                                            |                                                                                                                                                        |                                                                                                                                                             |
|---------------|------------------------------------|-----------------------|--------------------------------------------------------------------------------|---------------------------|------------------------------------------------------------------------------------------------------------|--------------------------------------------------------------------------------------------------------------------------------------------------------|-------------------------------------------------------------------------------------------------------------------------------------------------------------|
| Fusaoctaxin A |                                    |                       |                                                                                |                           |                                                                                                            |                                                                                                                                                        |                                                                                                                                                             |
| Residue       | Atom                               | $\delta_C$ , type     | Atom                                                                           | $\delta_H$ (J in Hz)      | $\delta_N$                                                                                                 | HMBC <sup>a</sup>                                                                                                                                      | ROESY                                                                                                                                                       |
| 1 GABA        | C                                  | 171.06, C             | NH <sub>2</sub>                                                                | 7.62 (Brd)                | 117.1                                                                                                      |                                                                                                                                                        |                                                                                                                                                             |
|               | C <sup><math>\alpha</math></sup>   | 31.7, CH <sub>2</sub> | H <sup><math>\alpha</math></sup>                                               | 2.22 (ddd, 2.2, 8,3)      |                                                                                                            | 1C <sup><math>\beta</math></sup> , 1C <sup><math>\gamma</math></sup> , 1C                                                                              | 2NH                                                                                                                                                         |
|               | C <sup><math>\beta</math></sup>    | 23.0, CH <sub>2</sub> | H <sup><math>\beta</math></sup>                                                | 1.75 (m, 2.2, 7,2)        |                                                                                                            | 1C <sup><math>\alpha</math></sup> , 1C <sup><math>\gamma</math></sup> , 1C                                                                             |                                                                                                                                                             |
|               | C <sup><math>\gamma</math></sup>   | 38.5, CH <sub>2</sub> | H <sup><math>\gamma</math></sup>                                               | 2.80 (Brd dd, 7,2)        |                                                                                                            | 1C <sup><math>\beta</math></sup>                                                                                                                       |                                                                                                                                                             |
| 2 L-ALA       | C                                  | 172.4, C              | NH                                                                             | 8.08 (d, 7,3)             | 125.8                                                                                                      | 2C <sup><math>\beta</math></sup> , 2C <sup><math>\alpha</math></sup> , 1C                                                                              | 1H <sup><math>\alpha</math></sup> , 3NH                                                                                                                     |
|               | C <sup><math>\alpha</math></sup>   | 48.2, CH              | H <sup><math>\alpha</math></sup>                                               | 4.41 <sup>b</sup>         |                                                                                                            | 2C <sup><math>\beta</math></sup> , 2C                                                                                                                  | 3NH                                                                                                                                                         |
|               | C <sup><math>\beta</math></sup>    | 18.5, CH <sub>3</sub> | H <sup><math>\beta</math></sup>                                                | 1.20 (d, 7,0)             |                                                                                                            | 2C <sup><math>\alpha</math></sup> , 2C                                                                                                                 | 3NH                                                                                                                                                         |
| 3 D-Ile       | C                                  | 171.1, C              | NH                                                                             | 7.845 <sup>b</sup>        | 111.2                                                                                                      | 3C <sup><math>\alpha</math></sup> , 2C                                                                                                                 | 2H <sup><math>\alpha</math></sup> , 2H <sup><math>\beta</math></sup> , 2NH, 4NH                                                                             |
|               | C <sup><math>\alpha</math></sup>   | 55.02, CH             | H <sup><math>\alpha</math></sup>                                               | 4.42 <sup>b</sup>         |                                                                                                            | 3C <sup><math>\gamma^1</math></sup> , 3C <sup><math>\beta</math></sup> , 3C <sup><math>\gamma^1</math></sup> , 3C                                      | 4NH                                                                                                                                                         |
|               | C <sup><math>\beta</math></sup>    | 37.1, CH              | H <sup><math>\beta</math></sup>                                                | 1.84 (m, 6,6)             |                                                                                                            | 3C <sup><math>\gamma^1</math></sup> , 3C <sup><math>\gamma^2</math></sup> , 3C <sup><math>\delta</math></sup>                                          | 4NH                                                                                                                                                         |
|               | C <sup><math>\gamma^1</math></sup> | 25.8, CH <sub>2</sub> | H <sup><math>\gamma^{1a}</math></sup><br>H <sup><math>\gamma^{1b}</math></sup> | 1.08 (m)                  |                                                                                                            | 3C <sup><math>\delta</math></sup> , 3C <sup><math>\gamma^2</math></sup> , 3C <sup><math>\beta</math></sup> , 3C <sup><math>\alpha</math></sup>         |                                                                                                                                                             |
|               |                                    | 14.2, CH <sub>3</sub> |                                                                                | 0.77 (d, 6,8)             |                                                                                                            | 3C <sup><math>\gamma^1</math></sup> , 3C <sup><math>\beta</math></sup> , 3C <sup><math>\alpha</math></sup>                                             |                                                                                                                                                             |
|               | C <sup><math>\delta</math></sup>   | 11.5, CH <sub>3</sub> | H <sup><math>\delta</math></sup>                                               | 0.84 <sup>b</sup>         |                                                                                                            | 3C <sup><math>\gamma^1</math></sup> , 3C <sup><math>\beta</math></sup>                                                                                 |                                                                                                                                                             |
| 4 D-Ser       | C                                  | 169.9, C              | NH                                                                             | 8.01 (d, 7,5)             | 115.4                                                                                                      | 4C <sup><math>\alpha</math></sup> , 4C <sup><math>\beta</math></sup> , 3C                                                                              | 3H <sup><math>\alpha</math></sup> , 3H <sup><math>\beta</math></sup> , 3NH, 5NH                                                                             |
|               | C <sup><math>\alpha</math></sup>   | 55.03, CH             | H <sup><math>\alpha</math></sup>                                               | 4.38 (dd, 5.8, 7,5)       |                                                                                                            | 4C <sup><math>\beta</math></sup> , 4C, 3C                                                                                                              | 5NH                                                                                                                                                         |
|               | C <sup><math>\beta</math></sup>    | 61.4, CH <sub>2</sub> | H <sup><math>\beta^2,3</math></sup><br>OH                                      | 3.60 (ddd, 5,6)           |                                                                                                            | 4C <sup><math>\alpha</math></sup> , 4C                                                                                                                 | 5NH                                                                                                                                                         |
|               |                                    |                       |                                                                                | 4.89 (dd, 5,3)            |                                                                                                            |                                                                                                                                                        |                                                                                                                                                             |
| 5 D-Val       | C                                  | 170.6, C              | NH                                                                             | 7.66 (d, 8,6)             | 115.6                                                                                                      | 5H <sup><math>\alpha</math></sup> , 4NH, 6NH                                                                                                           | 4H <sup><math>\alpha</math></sup> , 4H <sup><math>\beta</math></sup> , 4NH, 6NH                                                                             |
|               | C <sup><math>\alpha</math></sup>   | 57.4, CH              | H <sup><math>\alpha</math></sup>                                               | 4.22 <sup>b</sup>         |                                                                                                            | 5C <sup><math>\gamma^1</math></sup> , 5C <sup><math>\gamma^2</math></sup> , C <sup><math>\beta</math></sup> , 5C, 4C                                   | 6NH                                                                                                                                                         |
|               | C <sup><math>\beta</math></sup>    | 30.5, CH              | H <sup><math>\beta</math></sup>                                                | 2.00 (m, 6,6)             |                                                                                                            | 5C <sup><math>\gamma^1</math></sup> , 5C <sup><math>\gamma^2</math></sup> , 5C <sup><math>\alpha</math></sup> , 5C                                     | 6NH                                                                                                                                                         |
|               | C <sup><math>\gamma^1</math></sup> | 17.6, CH <sub>3</sub> | H <sup><math>\gamma^1</math></sup>                                             | 0.82 <sup>b</sup>         |                                                                                                            | 5C <sup><math>\gamma^2</math></sup> , 5C <sup><math>\beta</math></sup> , 5C <sup><math>\alpha</math></sup>                                             | 6NH                                                                                                                                                         |
|               | C <sup><math>\gamma^2</math></sup> | 19.0, CH <sub>3</sub> | H <sup><math>\gamma^2</math></sup>                                             | 0.85 <sup>b</sup>         |                                                                                                            | 5C <sup><math>\gamma^1</math></sup> , 5C <sup><math>\beta</math></sup> , 5C <sup><math>\alpha</math></sup>                                             | 6NH                                                                                                                                                         |
| 6 D-Ser       | C                                  | 169.7, C              | NH                                                                             | 7.92 (d, 7,7)             | 115.2                                                                                                      | 6C <sup><math>\alpha</math></sup> , 5C                                                                                                                 | 5H <sup><math>\alpha</math></sup> , 5H <sup><math>\beta</math></sup> , 5H <sup><math>\gamma^1</math></sup> , 5H <sup><math>\gamma^2</math></sup> , 5NH, 7NH |
|               | C <sup><math>\alpha</math></sup>   | 54.6, CH              | H <sup><math>\alpha</math></sup>                                               | 4.32 (ddd, 6,6, 7,3)      |                                                                                                            | 6C <sup><math>\beta</math></sup> , 6C, 5C                                                                                                              | 7NH                                                                                                                                                         |
|               | C <sup><math>\beta</math></sup>    | 61.6, CH <sub>2</sub> | H <sup><math>\beta^2</math></sup><br>H <sup><math>\beta^3</math></sup><br>OH   | 3.50 (ddd,                |                                                                                                            | 6C                                                                                                                                                     |                                                                                                                                                             |
|               |                                    |                       |                                                                                | 3.57 (ddd, 4,6, 4,8, 5,5) |                                                                                                            | 6C                                                                                                                                                     |                                                                                                                                                             |
|               |                                    |                       |                                                                                | 5.06 (5,5, 4,8)           |                                                                                                            |                                                                                                                                                        |                                                                                                                                                             |
| 7 D-Leu       | C                                  | 171.2, C              | NH                                                                             | 7.842 <sup>b</sup>        | 120.9                                                                                                      | 7C <sup><math>\alpha</math></sup> , 6C                                                                                                                 | 6H <sup><math>\alpha</math></sup> , 6NH, 8NH                                                                                                                |
|               | C <sup><math>\alpha</math></sup>   | 51.3, CH              | H <sup><math>\alpha</math></sup>                                               | 4.23 <sup>b</sup>         |                                                                                                            | 7C <sup><math>\beta</math></sup> , 7C, 6C                                                                                                              | 8NH                                                                                                                                                         |
|               | C <sup><math>\beta</math></sup>    | 40.6, CH <sub>2</sub> | H <sup><math>\beta^2,3</math></sup>                                            | 1.42-1.50 <sup>b</sup>    |                                                                                                            | 7C <sup><math>\gamma</math></sup> , 7C <sup><math>\delta^1</math></sup> , 7C <sup><math>\delta^2</math></sup> , 7C <sup><math>\alpha</math></sup> , 7C |                                                                                                                                                             |
|               | C <sup><math>\gamma</math></sup>   | 24.1, CH              | H <sup><math>\gamma</math></sup>                                               | 1.60 (m, 6,6, 7,0)        |                                                                                                            | 7C <sup><math>\delta^2</math></sup> , 7C <sup><math>\delta^1</math></sup> , 7C <sup><math>\beta</math></sup>                                           |                                                                                                                                                             |
|               | C <sup><math>\delta^1</math></sup> | 21.3, CH <sub>3</sub> | H <sup><math>\delta^1</math></sup>                                             | 0.82 <sup>b</sup>         |                                                                                                            | 7C <sup><math>\delta^2</math></sup> , 7C <sup><math>\gamma</math></sup> , 7C <sup><math>\beta</math></sup>                                             |                                                                                                                                                             |
|               | C <sup><math>\delta^2</math></sup> | 23.0, CH <sub>3</sub> | H <sup><math>\delta^2</math></sup>                                             | 0.86 <sup>b</sup>         |                                                                                                            | 7C <sup><math>\delta^1</math></sup> , 7C <sup><math>\gamma</math></sup> , 7C <sup><math>\beta</math></sup>                                             |                                                                                                                                                             |
| 8 L-Leucinol  | C                                  | 63.8, CH <sub>2</sub> | H <sup>1</sup>                                                                 | 3.18 (ddd, 6,0)           | 120.5                                                                                                      | 8C <sup><math>\alpha</math></sup> , 7C                                                                                                                 | 7H <sup><math>\alpha</math></sup> , 7NH                                                                                                                     |
|               |                                    |                       | H <sup>2</sup>                                                                 | 3.28 <sup>b</sup>         |                                                                                                            | 8C <sup><math>\beta</math></sup> , 8C <sup><math>\alpha</math></sup> ,                                                                                 |                                                                                                                                                             |
|               | C <sup><math>\alpha</math></sup>   | 48.7, CH              | H <sup><math>\alpha</math></sup>                                               | 3.75 (m, 4,7, 5,4)        |                                                                                                            | 8C <sup><math>\beta</math></sup> , 8C <sup><math>\alpha</math></sup> ,                                                                                 |                                                                                                                                                             |
|               | C <sup><math>\beta</math></sup>    | 39.8, CH <sub>2</sub> | H <sup><math>\beta^2,3</math></sup>                                            | 1.27 <sup>b</sup>         |                                                                                                            | 8C                                                                                                                                                     |                                                                                                                                                             |
|               | C <sup><math>\gamma</math></sup>   | 24.0, CH              | H <sup><math>\gamma</math></sup>                                               | 1.53 <sup>b</sup>         |                                                                                                            | 8C <sup><math>\delta^1</math></sup> , 8C <sup><math>\delta^2</math></sup> , 8C <sup><math>\gamma</math></sup> , 8C <sup><math>\alpha</math></sup> , 8C |                                                                                                                                                             |
|               | C <sup><math>\delta^1</math></sup> | 21.6, CH <sub>3</sub> | H <sup><math>\delta^1</math></sup>                                             | 0.80 <sup>b</sup>         |                                                                                                            | 8C <sup><math>\beta</math></sup>                                                                                                                       |                                                                                                                                                             |
|               | C <sup><math>\delta^2</math></sup> | 23.3, CH <sub>3</sub> | H <sup><math>\delta^2</math></sup>                                             | 0.85 <sup>b</sup>         |                                                                                                            | 8C <sup><math>\delta^2</math></sup> , 8C <sup><math>\gamma</math></sup> , 8C <sup><math>\beta</math></sup>                                             |                                                                                                                                                             |
|               |                                    | NH                    | 7.42 (d, 8,7)                                                                  |                           | 8C <sup><math>\delta^1</math></sup> , 8C <sup><math>\gamma</math></sup> , 8C <sup><math>\beta</math></sup> |                                                                                                                                                        |                                                                                                                                                             |

<sup>a</sup>HMBC correlations, optimized for long range  $J_{CH}$  of 8 Hz, are from proton(s) stated to the indicated carbon.

<sup>b</sup>Signal overlapping

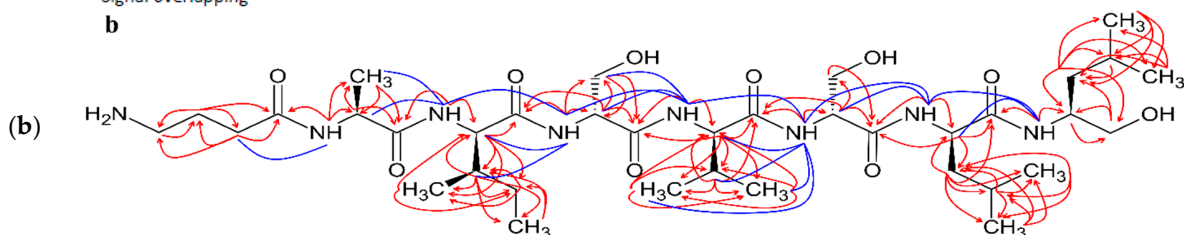

**Figure S4.** NMR Spectroscopic Data (600 MHz, (CD<sub>3</sub>)<sub>2</sub>SO) for fusaoctaxin A. **a**, Chemical shifts from the eight residues (1-8) for carbon ( $\delta_C$ ) including multiplicity (type), for hydrogen ( $\delta_H$ ) including coupling constants (J) in Hz where possible and for nitrogen ( $\delta_N$ ). HMBC correlations, optimised for long range  $J_{CH}$  of 8 Hz, are from proton(s) stated to the indicated carbon. <sup>1</sup>H-<sup>1</sup>H ROESY correlations only for inter-residue connectivities. <sup>1</sup>Partial or full overlapped signal. **b**, Structure of fusaoctaxin A elucidated by NMR with <sup>1</sup>H-<sup>13</sup>C HMBC (red arrows; directionality H→C) and inter-residue <sup>1</sup>H-<sup>1</sup>H ROESY (blue lines) correlations.

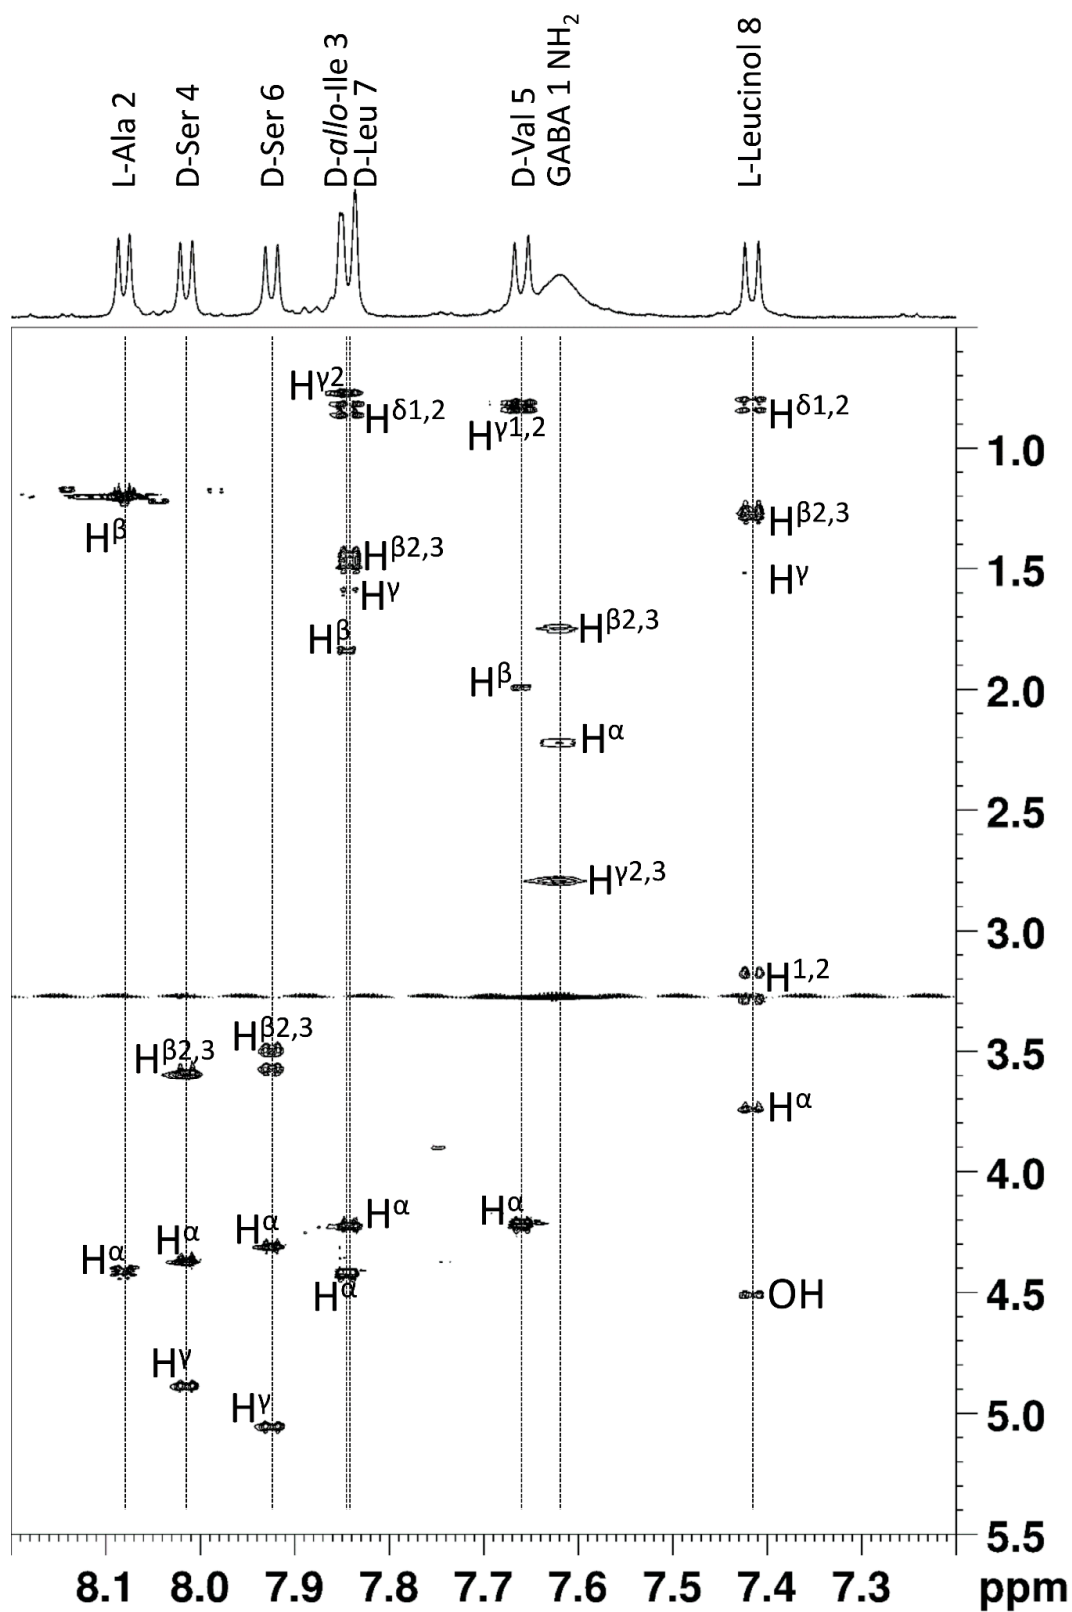

**Figure S5.** Region of TOCSY NMR spectrum of fusaoctaxin A in DMSO-d<sub>6</sub>. Eight spin systems (1–8) of fusaoctaxin A showing correlations (dotted lines) from H<sup>N</sup> to side chain atoms.

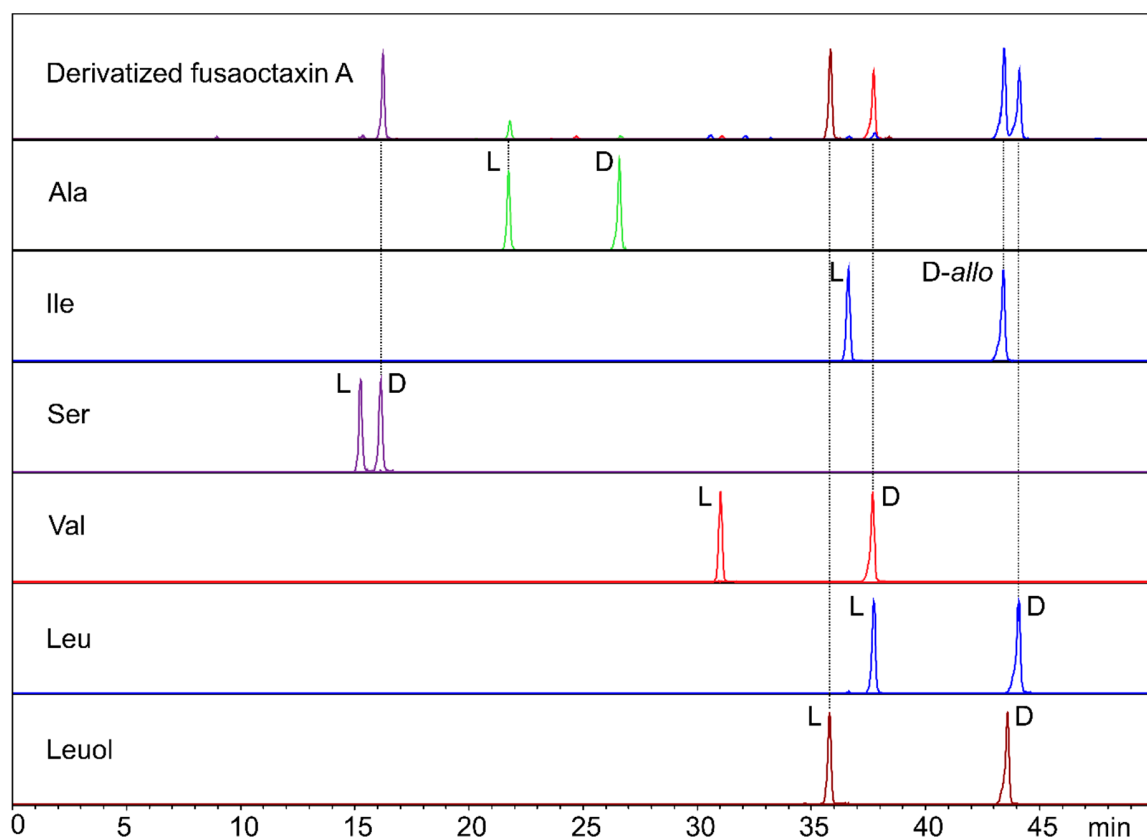

**Figure S6.** Marfey's assay for determination of absolute configuration of amino acids from fusaoctaxin A. Extracted ion chromatograms (EICs) from derivatised fusaoctaxin A aligned with EICs of derivatised L- and D- amino acid standards. L- and D- standards were analysed separately and the EICs have subsequently been overlaid. Dotted vertical lines indicate alignment from fusaoctaxin A to the respective standard. Green: EIC  $m/z$   $342.1042 \pm 0.005$  Da (derivatised alanine), Blue: EIC  $m/z$   $384.1514 \pm 0.005$  Da (derivatised isoleucine/leucine), Purple: EIC  $m/z$   $358.0993 \pm 0.005$  Da (derivatised serine), Red: EIC  $m/z$   $370.1357 \pm 0.005$  Da (derivatised valine), Brown: EIC  $m/z$   $370.1721 \pm 0.005$  Da (derivatised leucinol).

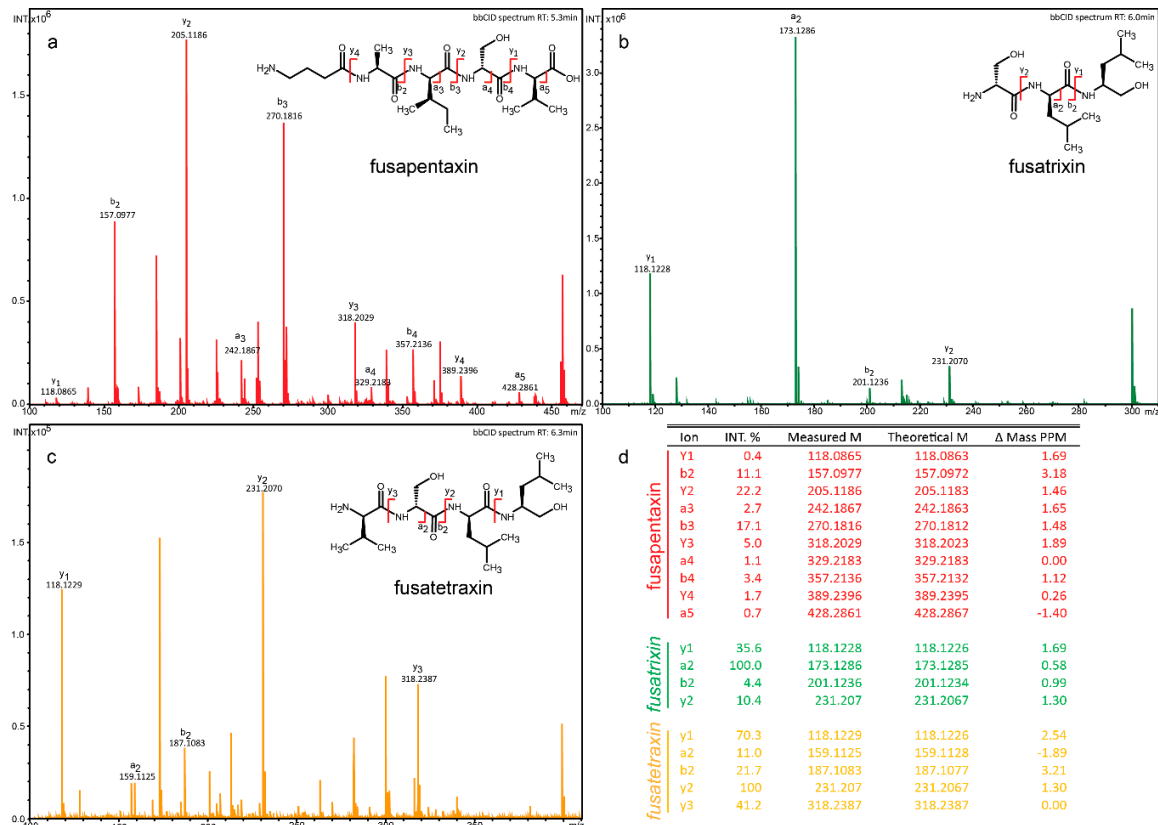

**Figure S7.** Amino acid sequence validation for compounds using 20 eV broadband Collision Induced Dissociation (bbCID) spectra from a HPLC-HRMS analysis of an OE::NRPS5OE::NRPS9 metabolite extract. **a**, bbCID spectrum of fusapentaxin (RT: 5.3 min,  $[M+H]^+$  474.2911 Da). The chemical structure of fusapentaxin with indicated a-, b-, y- fragmentations. **b**, bbCID spectrum of fusatrin (RT: 6.0 min,  $[M+H]^+$  318.2381 Da). The chemical structure of fusatrin with indicated a-, b-, y- fragmentations. **c**, bbCID spectrum of fusatetrxin (RT: 6.3 min,  $[M+H]^+$  417.3066 Da). The chemical structure of fusatetrxin with indicated a-, b-, y- fragmentations. **d**, Table of detected a-, b-, y- fragment ions for fusapentaxin (red), fusatrin (green), and fusatetrxin (orange), including relative intensity (INT. %), the theoretical charged monoisotopic mass (theoretical M), and the calculated mass deviation (PPM).

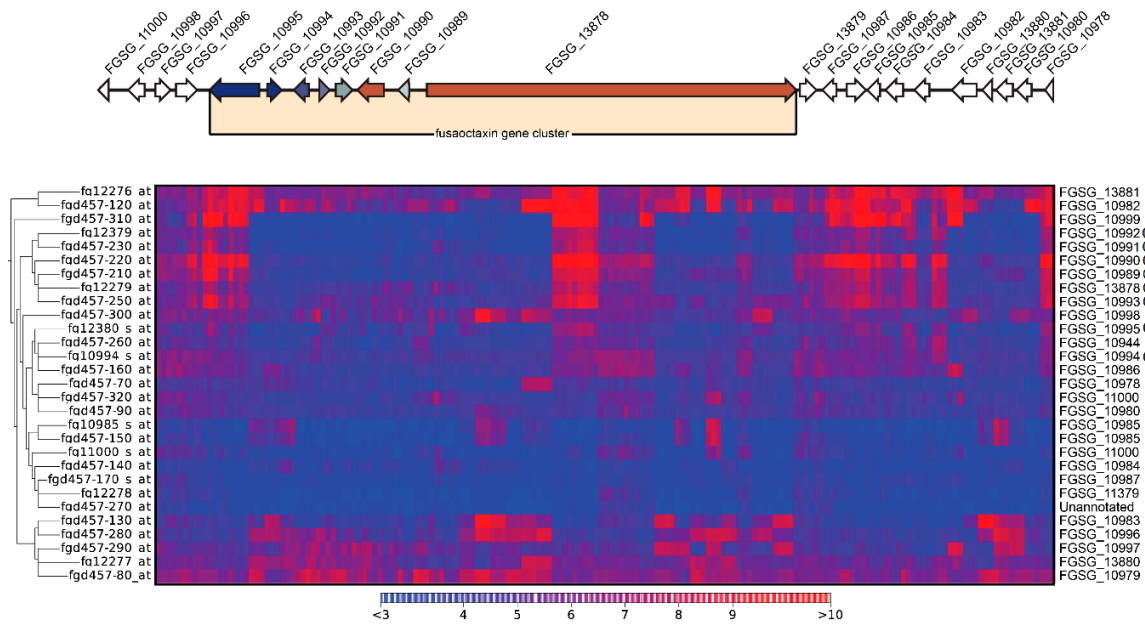

**Figure S8.** Hierarchical clustering. **a**, Fusaoctaxin A gene cluster in *F. graminearum*. **b**, 176 *F. graminearum* microarray chips from different experiments, using 29 probes representing fusaoctaxin A gene cluster and flanking genes.



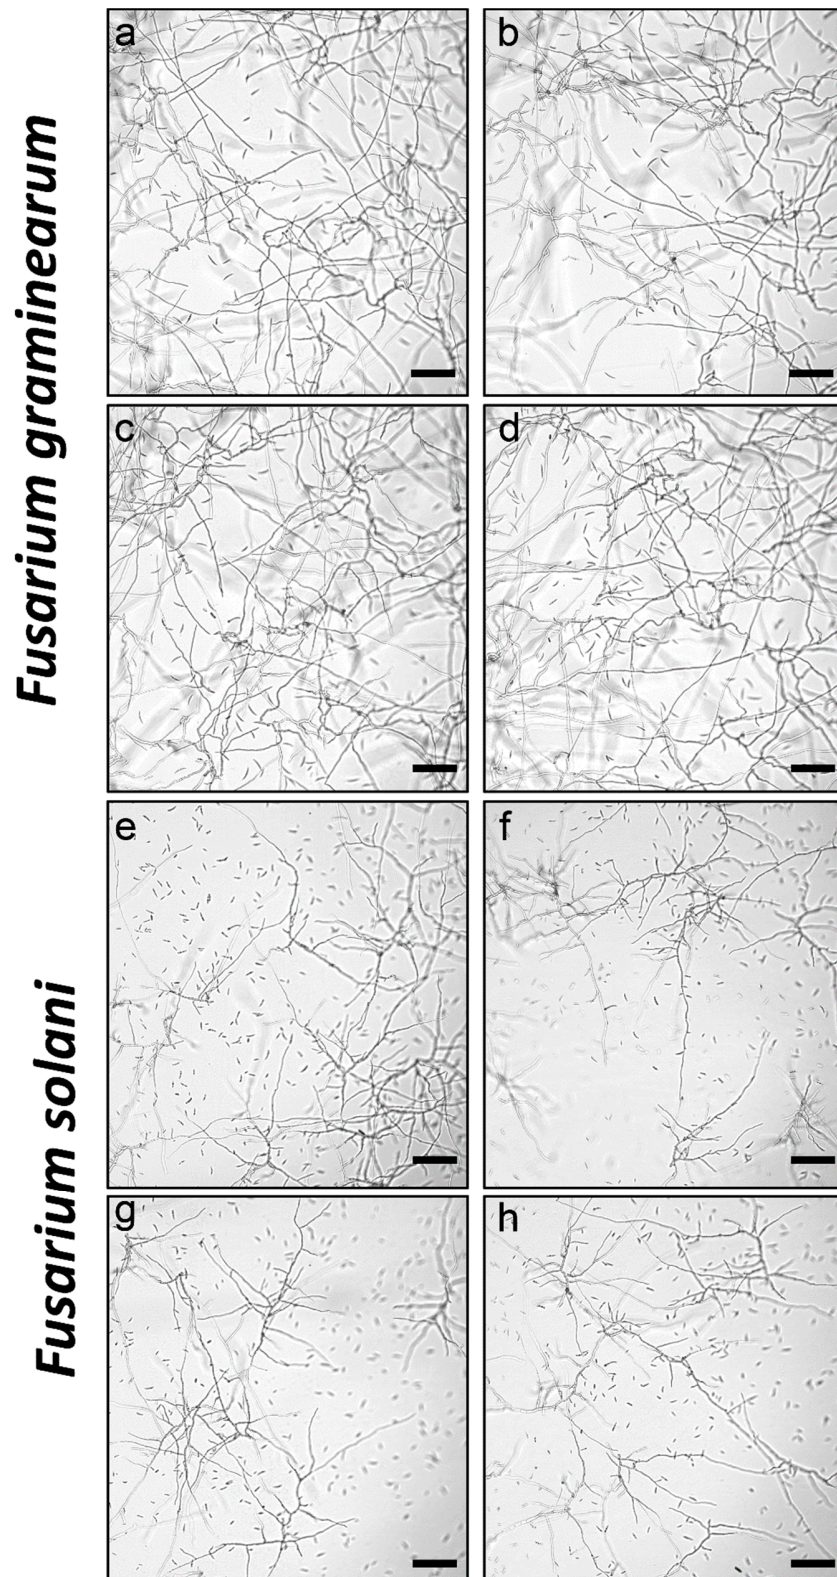

**Figure S9.** No phenotypic effects of fusaoctaxin A, fusapentaxin A and fusatrixin A in *Fusarium*. **a, e**, Control with 0.5% ethanol. **b, f**, 100  $\mu$ M fusaoctaxin A. **c, g**, 100  $\mu$ M fusapentaxin A. **d, h**, 100  $\mu$ M fusatrixin A. All experiments were performed in triplicates, scale bar is 200  $\mu$ m.

**Table S1.** Primer designs for gene knockout and over-expression mutants. [U] Primers designed with 9 bp overhangs for USER friendly cloning.

| Locus Tag  | Oligo Name | Description              | Sequence (5' → 3')                                   |
|------------|------------|--------------------------|------------------------------------------------------|
| FGSG_10982 | O1         | Peptidase<br>KO          | GGTCTTAA[U]CGACGTACAGATTACTTGCCAC                    |
|            | O2         |                          | GGCATTAA[U]GAGACTGTTGGGGAGAGTGATA                    |
|            | A3         |                          | GGACTTAA[U]TAGATCATGCAGGTGTGCTATC                    |
|            | A4         |                          | GGGTTTAA[U]CGTAGTTATTGGTCAAGACAGG                    |
| FGSG_10995 | O1         | ABC<br>transporter<br>KO | GGTCTTAA[U]CAGTGGCGAAGCAGTCTGAA                      |
|            | O2         |                          | GGCATTAA[U]ACAGTAGCCAGTCATCCGGTCAA                   |
|            | A3         |                          | GGACTTAA[U]TATCCAACGGCAGGCAGCTAT                     |
|            | A4         |                          | GGGTTTAA[U]AGTTCGTCCTTGCCATTGACG                     |
| FGSG_10990 | O1         | NRPS9 KO                 | GGTCTTAA[U]GGAGGCCGTTTTGTATGGTACCAG                  |
|            | O2         |                          | GGCATTAA[U]CAGATAGAAGAGACACAATCCAGTTGC<br>G          |
|            | A3         |                          | GGACTTAA[U]TCTTGTCTTCAATATCGGTGCTGTCT                |
|            | A4         |                          | GGGTTTAA[U]TTTGAACAAGGCCCTATTCTCGAA                  |
| FGSG_10990 | O1         | NRPS9 OE                 | GGTCTTAA[U]GGAGGCCGTTTTGTATGGTACCAG                  |
|            | O2         |                          | GGCATTAA[U]CAGATAGAAGAGACACAATCCAGTTGC<br>G          |
|            | O3         |                          | GGACTTAA[U]GGCTCCTCTTAACACTTATACGTCTACT              |
|            | O4         |                          | GGGTTTAA[U]TCGTTGAGCTGATGGTACGTCAAATT                |
| FGSG_17487 | O1         | NRPS5 OE                 | GGTCTTAA[U]GGTGTGATGTGTATAAATGAATGTGAAT<br>GTG       |
|            | O2         |                          | GGCATTAA[U]TAGATGATAACAATAGTATGGTAATGA<br>TGTGTGTG   |
|            | O3         |                          | GGACTTAA[U]GCCGCCACAAGATCATCCTA                      |
|            | O4         |                          | GGGTTTAA[U]CGAGCACGCTGGGCAATCAT                      |
| FGSG_10990 | Fw         | NRPS9 OE<br>(tubulin)    | ATTCCCGGGATGGCTCCTCTTAACACT                          |
|            | Rv         |                          | ATTGGICGCGCCCTATAAAACAGTAACTGTAACCTG                 |
|            | 5F         |                          | AACGCCAGGGTTTTCCAGTCACGACGCACCCTTCTTG<br>GATGACTCGC  |
| FGSG_15795 | 5R         | Kmt6 KO                  | ACTTAACGTTACTGAAATCTCCAACGTGCAGGACTGC<br>AGTTGTCAAGG |
|            | 3F         |                          | TTCAATATCATCTTCTGTCTCCGACGTTTCCGCTAGCTC<br>GAACCAGG  |
|            | 3R         |                          | GGATAACAATTCACACAGGAAACAGCTGCGTTGCCA<br>GTAGAACTTGC  |
|            |            |                          |                                                      |
| hph        | Fw         | hygromycin B             | GTCGGAGACAGAAGATGATATTGAAGGAGC                       |
|            | Rv         |                          | GTTGGAGATTCAGTAACGTTAAGTGGAT                         |
